# Supplementary material for: Mono-transition-metal-substituted polyoxometalate intercalated layered double hydroxides for the catalytic decontamination of sulfur mustard simulant
Source: Royal Society of Chemistry journal article supplement (doi:10.1039/c9dt00395a), 2019-01-01
Supplement: c9dt00395a1.pdf [file c9dt00395a1.pdf]

**Supporting Information**

**Mono-Transition-Metal-Substituted Polyoxometalate Intercalated  
Layered Double Hydroxides for the Catalytic Decontamination of  
Sulfur Mustard Simulant**

Xiangrong Sun, Jing Dong, Zhen Li, Huifang Liu, Xiaoting Jing, Yingnan Chi\*, Changwen Hu

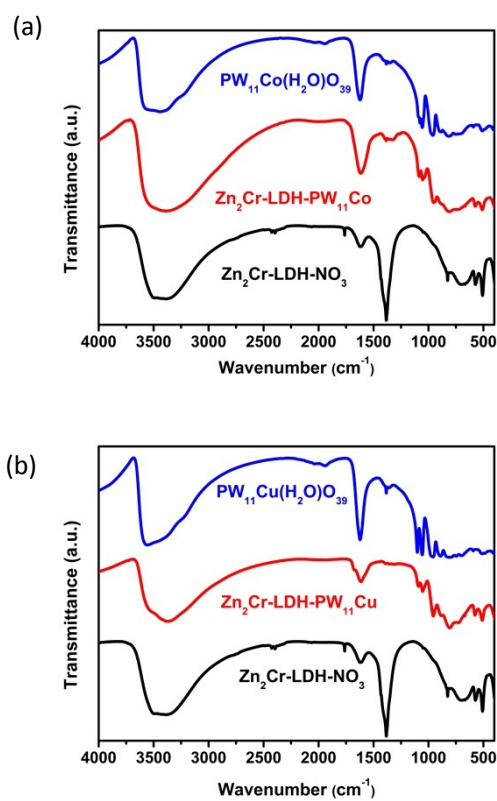

Figure S1. (a) FT-IR spectra of  $Zn_2Cr-LDH-PW_{11}Co$ ; (b) FT-IR spectra of  $Zn_2Cr-LDH-PW_{11}Cu$ .

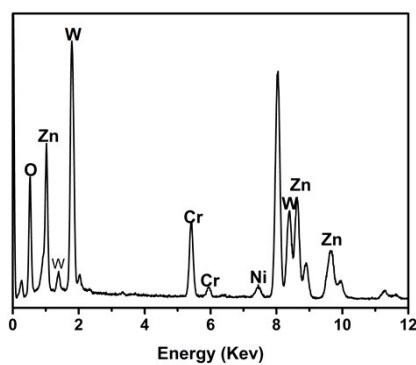

Figure S2. EDS of  $Zn_2Cr-LDH-PW_{11}Ni$ .

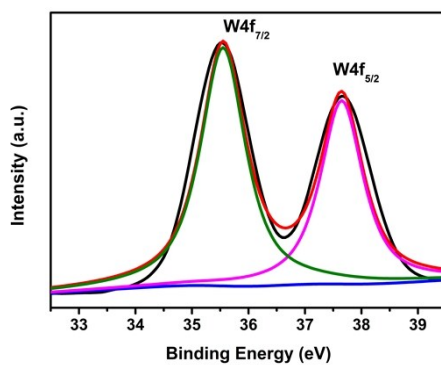

Figure S3. XPS spectra for the W4f core level spectrum of  $Zn_2Cr-LDH-PW_{11}Ni$ .

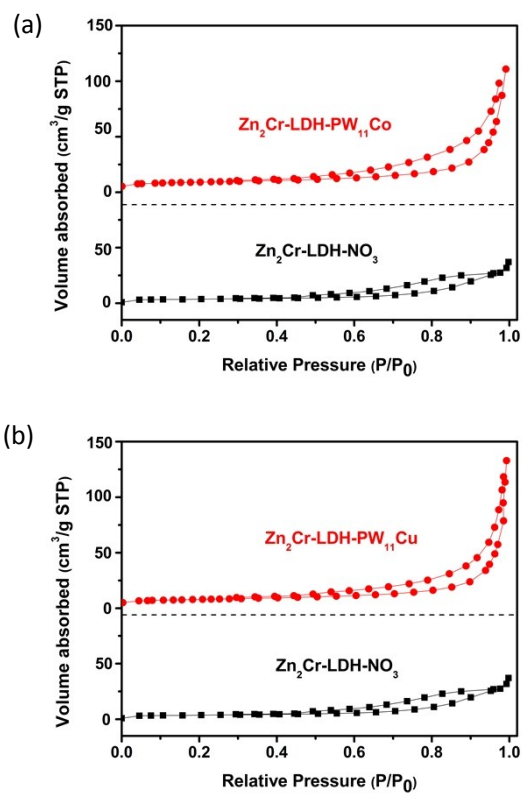

Figure S4. (a)  $N_2$  adsorption-desorption isotherms of  $Zn_2Cr-LDH-PW_{11}Co$ ; (b)  $N_2$  adsorption-desorption isotherms of  $Zn_2Cr-LDH-PW_{11}Cu$ .

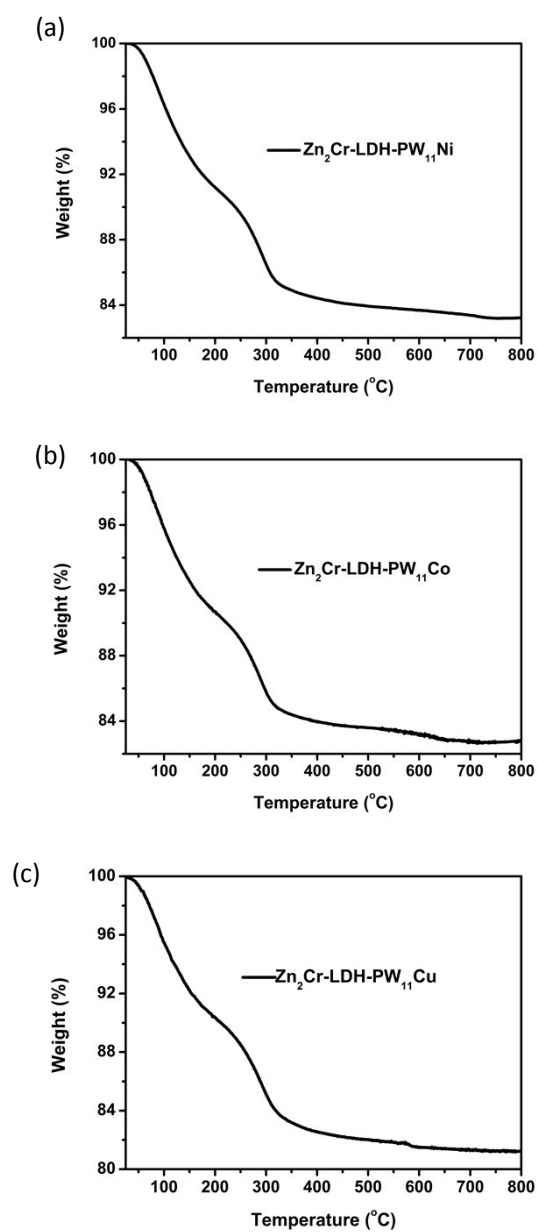

Figure S5. (a) TG analysis of  $\text{Zn}_2\text{Cr-LDH-PW}_{11}\text{Ni}$ ; (b) TG analysis of  $\text{Zn}_2\text{Cr-LDH-PW}_{11}\text{Co}$ . (c) TG analysis of  $\text{Zn}_2\text{Cr-LDH-PW}_{11}\text{Cu}$ .

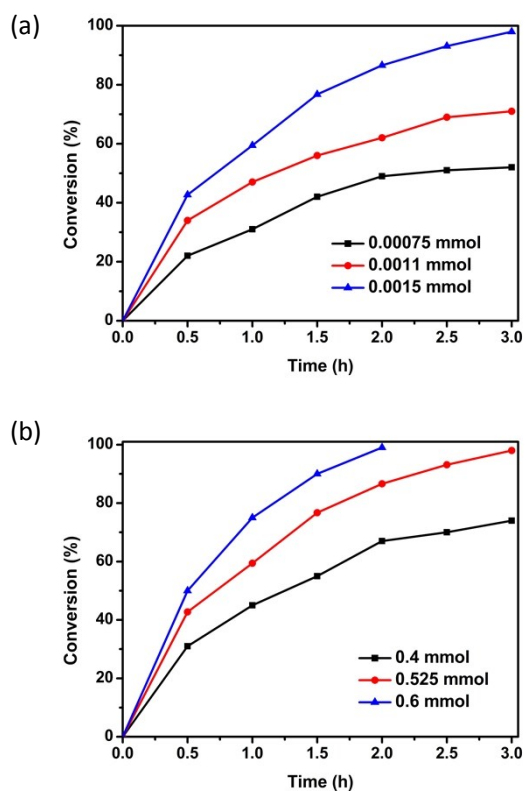

Figure S6. (a) Decontamination of CEES with different amounts of  $\text{Zn}_2\text{Cr-LDH-PW}_{11}\text{Ni}$ . Reaction conditions:  $\text{Zn}_2\text{Cr-LDH-PW}_{11}\text{Ni}$ , CEES (0.5 mmol), 1,3-dichlorobenzene (0.25 mmol), 3% aqueous  $\text{H}_2\text{O}_2$  (0.525 mmol) and acetonitrile (4 mL) at room temperature; (b) Decontamination of CEES with different amounts of 3% aqueous  $\text{H}_2\text{O}_2$ . Reaction conditions:  $\text{Zn}_2\text{Cr-LDH-PW}_{11}\text{Ni}$  (0.0015 mmol), CEES (0.5 mmol), 1,3-dichlorobenzene (0.25 mmol), 3% aqueous  $\text{H}_2\text{O}_2$  and acetonitrile (4 mL) at room temperature.

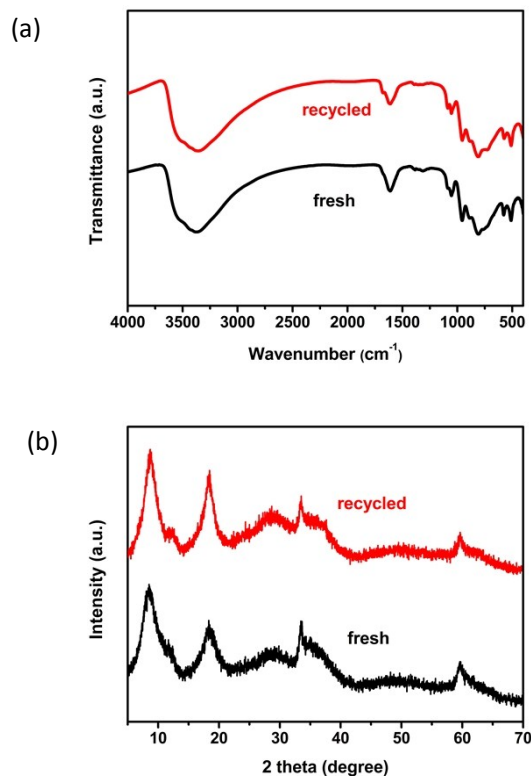

Figure S7. (a) FT-IR spectra of recycled  $\text{Zn}_2\text{Cr-LDH-PW}_{11}\text{Ni}$  and fresh  $\text{Zn}_2\text{Cr-LDH-PW}_{11}\text{Ni}$ ; (b) PXRD spectra of recycled  $\text{Zn}_2\text{Cr-LDH-PW}_{11}\text{Ni}$  and fresh  $\text{Zn}_2\text{Cr-LDH-PW}_{11}\text{Ni}$ .

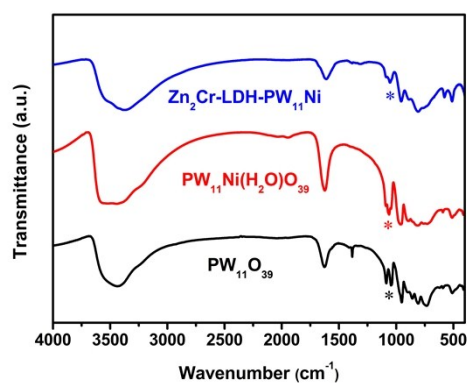

Figure S8. FT-IR spectra of  $\text{Zn}_2\text{Cr-LDH-PW}_{11}\text{Ni}$ ,  $\text{PW}_{11}\text{Ni}$  and  $\text{PW}_{11}\text{O}_{39}$ . The P-O band splitting of  $\text{Zn}_2\text{Cr-LDH-PW}_{11}\text{Ni}$  (marked with blue star) was obviously weaker than that of  $\text{PW}_{11}\text{O}_{39}$  (marked with black star), indicating that  $\text{PW}_{11}\text{Ni}$  keeps integrity during intercalation process.<sup>[1, 2]</sup>

Table S1. The oxidation of CEES catalyzed by Zn<sub>2</sub>Cr-LDH-PW<sub>11</sub>Ni with adding radical scavengers.

| Radical scavengers                                                         | Time (h) | Conversion (%) |
|----------------------------------------------------------------------------|----------|----------------|
| -                                                                          | 3        | 98             |
| <i>p</i> -benzoquinone ( $\bullet\text{O}_2^-/\bullet\text{O}_2\text{H}$ ) | 3        | 94             |
| <i>tert</i> -butyl alcohol ( $\bullet\text{OH}$ )                          | 3        | 98             |
| diphenylamine ( $\bullet\text{OH}$ )                                       | 3        | 98             |

Reaction conditions: CEES (0.5 mmol), 1,3-dichlorobenzene (internal standard, 0.25 mmol), radical scavengers (0.5 mmol) and Zn<sub>2</sub>Cr-LDH-PW<sub>11</sub>Ni (0.0015 mmol) were dispersed in acetonitrile (4 mL). After mixing evenly, 3 % aqueous H<sub>2</sub>O<sub>2</sub> (0.525 mmol) was added to initiate the reaction.

## References

- 1 F. Zonnevijlle, C. M. Touren, and G. F. Touren, *Inorg Chem*, 1982, **21**, 2742–2750.
- 2 J. H. Choi, J. K. Kim, D. R. Park, T. H. Kang, J. H. Song and I. K. Song, *J Mol Catal A: Chem*, 2013, **371**, 111-117.
